# Supplementary material for: A conserved and essential basic region mediates tRNA binding to the Elp1 subunit of the Saccharomyces cerevisiae Elongator complex
Source: PubMed Central journal article supplement (PMC4150532; doi:10.1111/mmi.12624), 2014-05-19
Supplement: mmi0092-1227-SD1.pdf [file mmi0092-1227-SD1.pdf]

## Figure S1

**A**

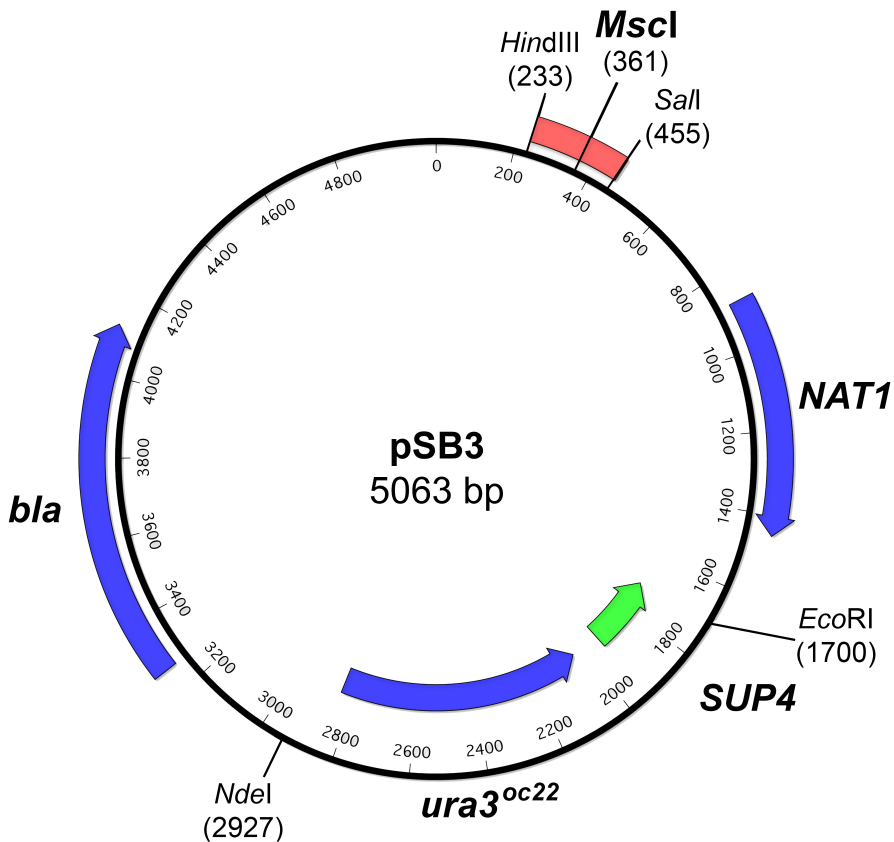

**B**

*HindIII* (495)

AAGCTTTGCAGAGGCTAGCAGAATTACCCCTCCACGTTGATTGTCTGCGAGGCAAGAATGATCATCA 623 209  
 CCGTAGTGAGAGTGCGTTCAAGGCTCTTGCGGTTGCCATAAGAGAAGCCACCTCGCCCAATGG | CC  
 MscI  
 AAGCATTCCGGCTGGTTCGCTAATCGTTGAGTGCATTGGTGACTTACACATAGACGACCATCACACC  
 ACTGAAGACTGCGGGATTGCTCTCGGTCgac  
 304 Sall

**Figure S1.** Construction of a plasmid for targeting single-copy integration of *SUP4* and a *ura3 ochre* allele to the *his3* locus. (A) Plasmid map showing the position of the restriction sites that define the different DNA sequences used in construction of the plasmid, together with the unique *MscI* site used to target the construct in single copy to the *HIS3* locus. *bla*, ampicillin resistance; *NAT1*, ClonNat resistance (bracketed by *TEF* promoter and terminator sequences that are not shown); *ura3<sup>oc22</sup>*, *ura3* allele in which codon 22 is substituted by an *ochre* termination codon; *SUP4*, tRNA<sup>Tyr</sup>(UUA) ochre suppressor tRNA. (B) Sequence of the *HindIII*-*Sall* fragment used for *HIS3* targeting. Upper-case letters correspond to the *HIS3* coding sequence positions indicated (numbered from the first base of the *HIS3* open reading frame), lower case letters represent additional bases required to generate the *Sall* site. Linearization using *MscI* (|, cut site) generates a fragment flanked by *HIS3* residues 209-304 and 495-623 that integrates in single copy at the *HIS3* locus.
